# Supplementary material for: Depth and Dissolved Organic Carbon Shape Microbial Communities in Surface Influenced but Not Ancient Saline Terrestrial Aquifers
Source: Front Microbiol. 2018 Nov 27;9:2880. doi: 10.3389/fmicb.2018.02880 (PMC6277548; doi:10.3389/fmicb.2018.02880)
Supplement: TABLE S1 — Sampling and sequencing information of 21 borehole sections representing the borehole and sample name, water type, total volume of water sampled, DNA extracted, number of read pairs obtained from the sequencing facility, after merging and quality trimming, and the amount of OTUs. [file Table_1.XLSX]

## Sheet: Supplemental Table 1
Borehole ID	Sample name	Water type	Total water volume (L)	DNA (ng/µL)	Read pairs (2×301 bp)	Reads after merging	Reads after quality trimming	Amount of OTUs
SA1009B-1	MM-139.7a	Marine signature	42	25.1	226948	93532	81044	1481
SA1009B-2	MM-139.7b	Marine signature	24	31.7	75970	21493	18584	1145
SA1009B-3	MM-139.7c	Marine signature	85	60.0	83318	24996	22218	1144
SA1229A-1	MM-171.3a	Marine signature	50	3.5	126805	46048	40288	1179
SA1229A-2	MM-171.3b	Marine signature	90	6.5	310681	143231	127406	1755
SA1229A-3	MM-171.3c	Marine signature	197	6.6	296671	117589	102790	1610
SA1420A-1	MM-200.6a	Marine signature	173	60.0	206663	77238	69545	1349
SA1420A-2	MM-200.6b	Marine signature	244	60.0	87162	32255	29377	1014
SA1420A-3	MM-200.6c	Marine signature	264	51.0	180840	67264	61743	888
SA2074A-1	MM-281.7a	Marine signature	170	25.4	512732	177817	159266	1574
SA2074A-2	MM-281.7b	Marine signature	247	20.5	553491	207941	187738	1634
SA2074A-3	MM-281.7c	Marine signature	239	24.0	139337	47252	42557	1202
SA2273A-1	MM-305.9a	Marine signature	20	39.0	101102	34356	28404	1049
SA2273A-2	MM-305.9b	Marine signature	19	33.3	163488	63909	58196	1221
SA2273A-3	MM-305.9c	Marine signature	99	60.0	177077	64482	54757	1294
KA2051A01-9-1	MM-310.3a	Marine signature	131	55.0	88898	29065	26041	950
KA2051A01-9-2	MM-310.3b	Marine signature	145	57.0	178261	61965	56077	934
KA2051A01-9-3	MM-310.3c	Marine signature	116	56.0	168562	57739	50749	1034
KA2050A-3-1	MM-318.9a	Marine signature	147	60.0	199834	72892	55318	1142
KA2050A-3-2	MM-318.9b	Marine signature	104	35.0	157757	54497	45411	1261
KA2050A-3-3	MM-318.9c	Marine signature	72	42.6	178225	58423	50171	1291
KA2051A01-5-1	MM-349.1a	Marine signature	150	60.0	233329	82920	66041	1358
KA2051A01-5-2	MM-349.1b	Marine signature	260	41.4	180096	55824	49391	1349
KA2051A01-5-3	MM-349.1c	Marine signature	211	60.0	185862	68362	60237	1378
KA2511A-5-1	MM-349.5a	Marine signature	170	51.0	271334	88211	79728	1102
KA2511A-5-2	MM-349.5b	Marine signature	148	60.0	467106	150844	134429	1097
KA2511A-5-3	MM-349.5c	Marine signature	213	60.0	187472	51390	47782	764
KA3105A-4-1	MM-415.2a	Marine signature	235	2.1	297779	111752	100472	1508
KA3105A-4-2	MM-415.2b	Marine signature	215	6.1	222921	89354	78640	1565
KA3105A-4-3	MM-415.2c	Marine signature	198	4.5	366105	135823	121888	1442
KA3105A-3-1	MM-415.6a	Marine signature	110	60.0	92757	33809	30654	1052
KA3105A-3-2	MM-415.6b	Marine signature	145	60.0	138999	47213	42111	913
KA3105A-3-3	MM-415.6c	Marine signature	80	29.6	138664	50708	46341	943
HD0025A-1	MM-415.8a	Marine signature	11	23.4	301083	118072	109725	1402
HD0025A-2	MM-415.8b	Marine signature	7	9.2	421785	177461	162643	1550
HD0025A-3	MM-415.8c	Marine signature	5	5.9	117257	46086	42271	1156
KA3110A-1	MM-415.9a	Marine signature	144	42.1	119887	41155	34547	1185
KA3110A-2	MM-415.9b	Marine signature	149	38.6	173410	59664	47335	1211
KA3110A-3	MM-415.9c	Marine signature	162	41.9	183126	63859	54007	1351
KA2050A-1-1	MM-422.8a	Marine signature	171	60.0	83604	19993	17695	1067
KA2050A-1-2	MM-422.8b	Marine signature	229	60.0	87086	20879	18421	1095
KA2050A-1-3	MM-422.8c	Marine signature	139	48.1	158324	48505	42247	1290
KA3600F-2-1	MM-446.8a	Marine signature	601	28.7	181389	67444	61049	1188
KA3600F-2-2	MM-446.8b	Marine signature	738	60.0	320223	119180	103490	1309
KA3600F-2-3	MM-446.8c	Marine signature	548	53.0	380297	147953	130818	1319
KA3600F-1-1	MM-446.9a	Marine signature	197	50.0	227537	78002	70882	950
KA3600F-1-2	MM-446.9b	Marine signature	100	9.1	277551	103890	96033	1210
KA3600F-1-3	MM-446.9c	Marine signature	75	9.4	444916	162528	147982	1274
KA3385A-1	TM-448.4a	Thoroughly mixed	302	0.5	297445	98494	91621	955
KA3385A-2	TM-448.4b	Thoroughly mixed	268	1.3	194555	72055	66297	980
KA3385A-3	TM-448.4c	Thoroughly mixed	271	0.8	466187	152670	141242	952
SA1730A-1	OS-237.0a	Old saline	187	10.2	66266	20571	18628	932
SA1730A-2	OS-237.0b	Old saline	234	0.1	101824	36090	33019	1231
SA1730A-3	OS-237.0c	Old saline	260	11.9	151534	55117	50124	1241
KA1755A-3-1	OS-279.9a	Old saline	17	0.3	322720	135728	122391	1219
KA1755A-3-2	OS-279.9b	Old saline	15	0.1	105063	45225	42206	1138
KA1755A-3-3	OS-279.9c	Old saline	14	0.2	56708	16357	14733	830
SA2600A-1	OS-345.0a	Old saline	208	10.2	239919	89805	81682	1458
SA2600A-2	OS-345.0b	Old saline	295	13.1	336792	127096	116028	1478
SA2600A-3	OS-345.0c	Old saline	249	8.8	380877	153394	139623	1588
KA2862A-1	OS-380.6a	Old saline	42	0.3	260018	88623	82527	1182
KA2862A-2	OS-380.6b	Old saline	42	0.4	235214	83946	77849	1142
KA2862A-3	OS-380.6c	Old saline	60	0.6	299168	115934	107762	1308
